# Supplementary material for: The Ablation of Mitochondrial Protein Phosphatase Pgam5 Confers Resistance Against Metabolic Stress
Source: PubMed Central journal article supplement — eBioMedicine. 2016 Jan 29;5:82–92. doi: 10.1016/j.ebiom.2016.01.031 (PMC4816851; doi:10.1016/j.ebiom.2016.01.031), 2016-01-29
Supplement: mmc1.pdf [file mmc1.pdf]

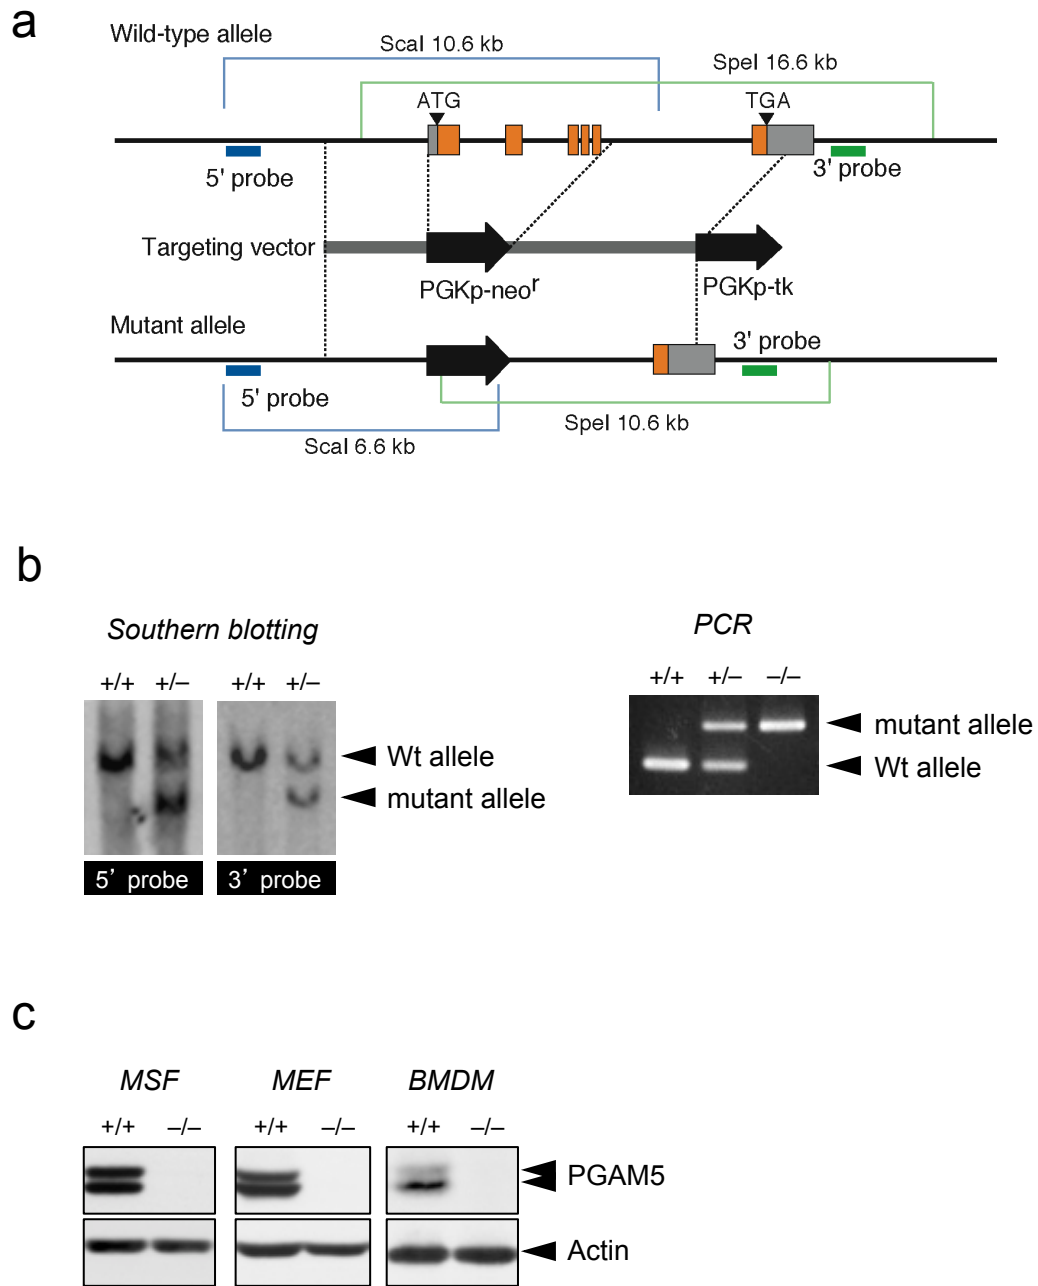

Supplementary Figure 1 Generation of Pgam5 knockout (KO) mice.

**a**

Thermogenesis

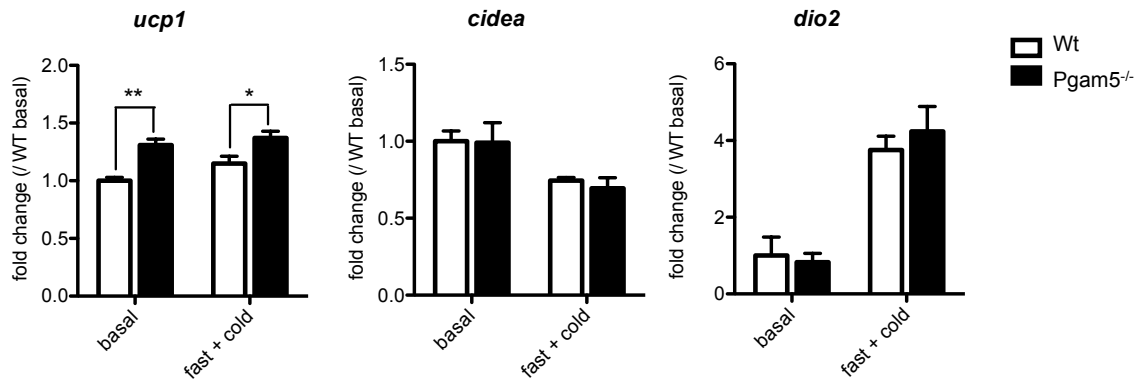**b**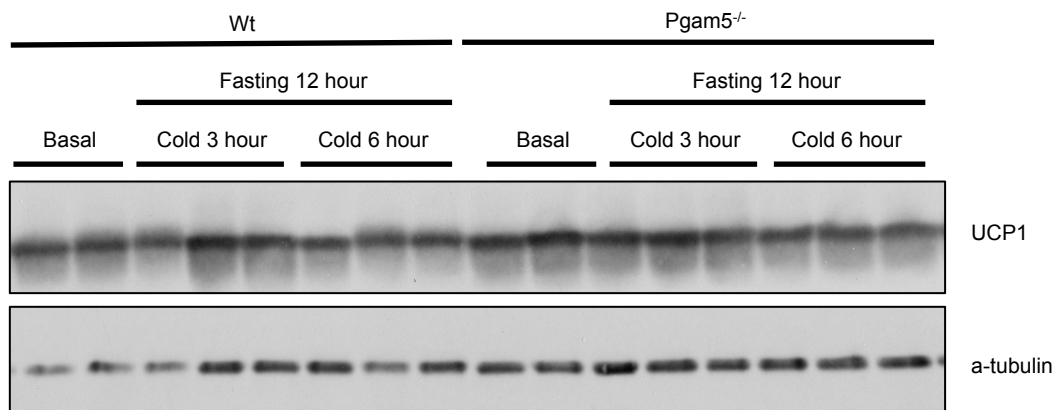**Supplementary Figure 2**

The expression levels of several genes related to adaptive thermogenesis in Pgam5-KO-mice-derived brown adipose tissue (BAT) are comparable to those in Wt mice.

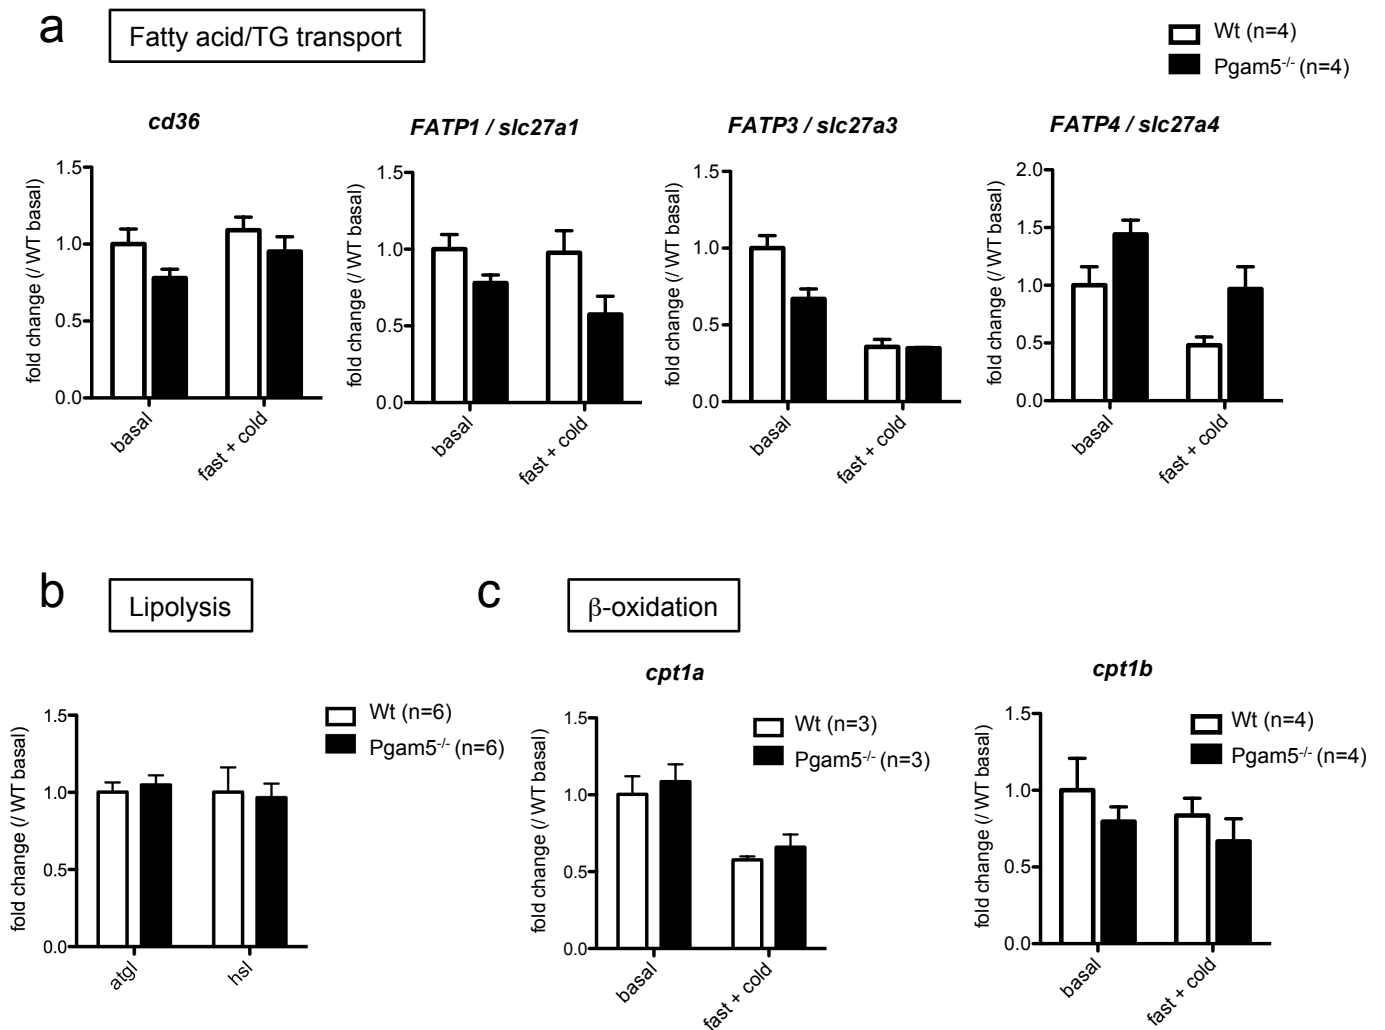

Supplementary Figure 3

Almost all the gene expression levels related to lipid metabolism in Pgam5-deficient BAT were comparable to those in Wt mice.

a

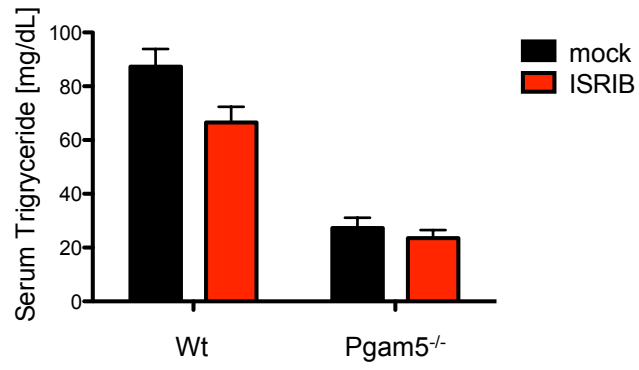

b

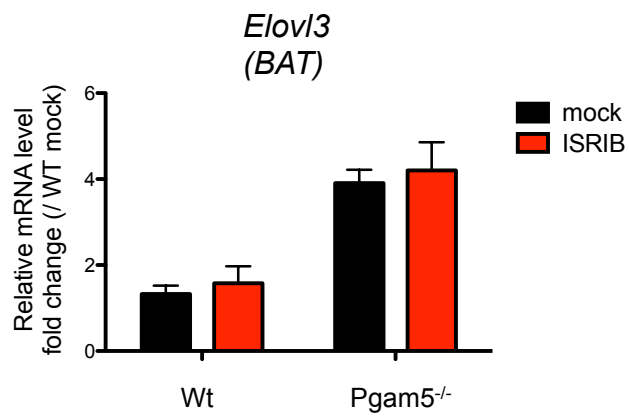

Supplementary Figure 4

The enhancement of lipid metabolism is not induced downstream of FGF21 induction.

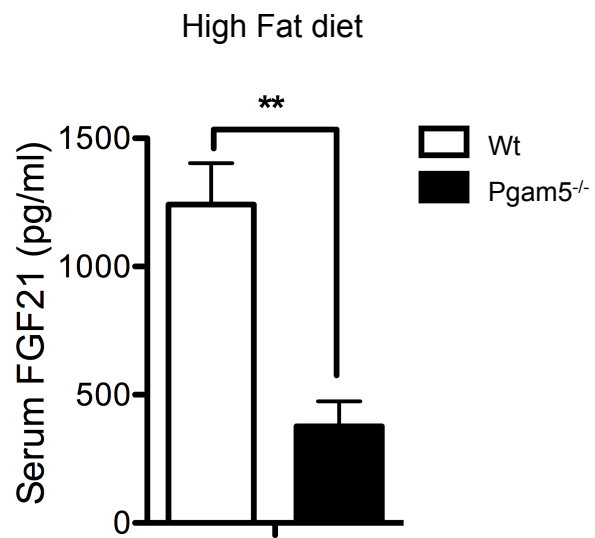

Supplementary Figure 5

Under high fat diet (HFD)-fed condition, serum FGF21 level is not enhanced in Pgam5 KO mice.

## 1 **Supporting Information Figure legends**

### 2 **S1 Figure.**

#### 3 **Generation of Pgam5 knockout (KO) mice.**

4 (a) A schematic representation of the targeting vector and the targeting allele of the Pgam5 gene.  
5 The coding exons are depicted by orange boxes. Probes for Southern blot analysis are shown as  
6 blue and green lines. ScaI I, SpeI, restriction enzyme site; PGKp, phosphoglycerate kinase 1  
7 promoter; neo, neomycin-resistant gene cassette; tk, thymidine kinase. (b) Genotyping of F1  
8 mice (left panels) and homozygous mice (right panel). Genomic DNA extracted from mouse  
9 tails was examined by Southern blotting and PCR. The WT and mutant alleles were detected as  
10 10.6- and 6.6-kb bands by the 5' probe and 16.6- and 10.6 kb bands by the 3' probe in Southern  
11 blotting and as 179- and 279-bp in PCR. (c) An immunoblot of PGAM5 in the primary cultured  
12 cells that were derived from WT and Pgam5 KO mice. MSF, mouse skin fibroblasts; MEF,  
13 mouse embryonic fibroblasts; BMDM, bone marrow-derived macrophages.

14

### 15 **S2 Figure.**

#### 16 **The expression levels of several genes related to adaptive thermogenesis in Pgam5**

17 **KO-mice-derived brown adipose tissue (BAT) are comparable to those in WT**  
18 **mice.**

19 (a) Expression of the indicated genes in BAT from WT and Pgam5 KO mice under basal  
20 conditions or at 6 h of cold exposure after 12 h of fasting, as determined via quantitative  
21 RT-PCR (n=4). (b) Representative immunoblots for the indicated proteins derived from WT and  
22 Pgam5 KO mice under basal conditions or at 3 and 6 h of cold expose after 12 h of fasting. Data  
23 are expressed as the mean±SEM, \*\*p<0.01, \*p<0.05; two-way ANOVA/Bonferroni post-test  
24 (a).

25

26 **S3 Figure.**

27 **Almost all the gene expression levels related to lipid metabolism in**  
28 **Pgam5-deficient BAT were comparable to those in WT mice.**

29 (a, b, and c) Expression of the indicated genes related to lipid transporters (a), lipolysis (b), and  
30  $\beta$ -oxidation (c) in BAT from WT and Pgam5 KO mice under basal conditions or at 6 h of cold  
31 exposure after 12 h of fasting, as determined via quantitative RT-PCR . Data are expressed as  
32 the mean±SEM (n=3-6).

33 **S4 Figure.**

34 **The enhancement of lipid metabolism is not induced downstream of FGF21**

35 **induction.**

36 (a and b) After fasting for 12 h, WT and Pgam5 KO mice were treated with 2.5 mg/kg body

37 weight ISRIB or mock i.p. and subsequently exposed to cold stress. After 5 h, the triglyceride

38 (TG) levels in the serum (a), and *Elovl3* gene expression in BAT (b), was determined. Data are

39 expressed as the mean±SEM (WT; n=4 for each, Pgam5 KO; mock n=3, ISRIB n=4).

40

41 **S5 Figure.**

42 **High-fat-diet (HFD)-fed conditions do not enhance serum FGF21 levels in Pgam5**

43 **KO mice.**

44 The serum FGF21 concentration of WT and Pgam5 KO mice that were fed a HFD for 15 weeks

45 was quantified by ELISA. Data are expressed as the mean±SEM (n=6 each), \*\*p<0.01;

46 unpaired Student's t-test.

47

48

49
